# Supplementary material for: Self-reported Pruritus and Clinical, Dialysis-Related, and Patient-Reported Outcomes in Hemodialysis Patients
Source: PubMed Central journal article supplement — Kidney Med. 2020 Nov 21;3(1):42–53.e1. doi: 10.1016/j.xkme.2020.08.011 (PMC7873756; doi:10.1016/j.xkme.2020.08.011), 2020-11-21
Supplement: mmc1.pdf [file mmc1.pdf]

## Supplementary Material Table of Contents

**Figure S1.** Self-reported pruritus, by DOPPS phase and country

**Table S1a.** Listing of specific causes of death classified as cardiovascular or infection-related

**Table S1b.** Listing of specific hospitalization diagnosis and procedure codes classified as cardiovascular, infection, skin-related, or mental status change/confusion

**Table S2.** Patient characteristics for included vs. excluded patients

**Table S3.** Pruritus and HR (95% CI) of all-cause mortality, by level of adjustment

Figure S1

Self-reported pruritus, by DOPPS phase and country

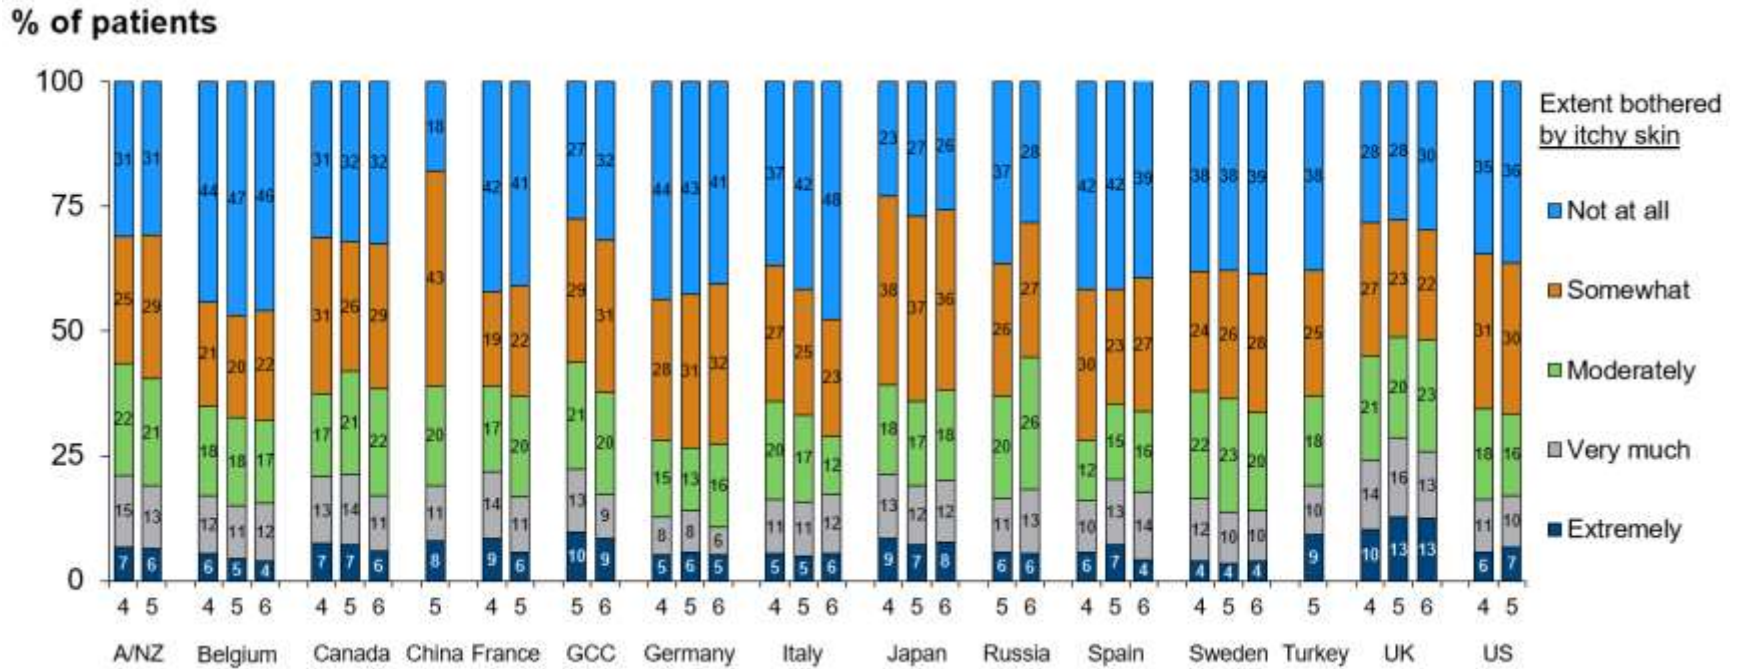

DOPPS 4: 2009-2011; DOPPS 5: 2012-2015; DOPPS 6: 2015-2018; A/NZ=Australia/New Zealand; GCC=Gulf Cooperation Council countries (Bahrain, Kuwait, Oman, Qatar, Saudi Arabia, United Arab Emirates); UK=United Kingdom; US=United States.

Table S1a

**Listing of specific causes of death classified as cardiovascular or infection-related**

| <b>N events</b>                        | <b>Primary cause of death</b>                               |
|----------------------------------------|-------------------------------------------------------------|
| <b>Cardiovascular-related (N=1402)</b> |                                                             |
| 509                                    | Cardiac Arrest, Cause Unknown                               |
| 280                                    | Myocardial Infarction, Acute                                |
| 142                                    | Congestive Heart Failure                                    |
| 102                                    | Cerebro-Vascular Accident Including Intracranial Hemorrhage |
| 89                                     | Cardiac Arrhythmia                                          |
| 57                                     | Stroke - ischemic                                           |
| 47                                     | Atherosclerotic Heart Disease                               |
| 47                                     | Mesenteric Infarction/Ischemic Bowel                        |
| 35                                     | Cardiomyopathy                                              |
| 26                                     | Pulmonary Edema Due To Exogenous Fluid                      |
| 25                                     | Ischemic Brain Damage/Anoxic Encephalopathy                 |
| 21                                     | Valvular Heart Disease                                      |
| 16                                     | Hyperkalemia                                                |
| 5                                      | Pericarditis, Incl. Cardiac Tamponade                       |
| 1                                      | Hypokalemia                                                 |
| <b>Infection-related (N=536)</b>       |                                                             |
| 197                                    | Pulmonary Infection (pneumonia, influenza)                  |
| 165                                    | Septicemia, Other                                           |
| 74                                     | Septicemia, Due To Peripheral Vascular Disease, Gangrene    |
| 35                                     | Infection, Other                                            |
| 33                                     | Septicemia, Due To Vascular Access                          |
| 15                                     | Abdominal Infection (peritonitis, perforated bowel, etc.)   |
| 11                                     | Cardiac Infection (endocarditis)                            |
| 6                                      | Genito-urinary infection (urinary tract infection, etc.)    |

Number of events will sum to the total because patients can have a maximum of 1 primary cause of death

Table S1b

**Listing of specific hospitalization diagnosis and procedure codes classified as cardiovascular, infection, skin-related, or mental status change/confusion**

| <b>N events</b>                        | <b>Diagnosis or Procedure code</b>          |
|----------------------------------------|---------------------------------------------|
| <b>Cardiovascular-related (N=3060)</b> |                                             |
| 991                                    | Procedure: Other Cardiac/Cardiovascular     |
| 619                                    | Procedure: Cardiac catheterization          |
| 538                                    | Diagnosis: Angina                           |
| 470                                    | Diagnosis: Other Cardiac/Cardiovascular     |
| 347                                    | Diagnosis: Chest pain, MI ruled out         |
| 333                                    | Diagnosis: Congestive heart failure         |
| 302                                    | Diagnosis: Atrial fibrillation              |
| 269                                    | Diagnosis: Other arrhythmia                 |
| 261                                    | Diagnosis: Hypertension                     |
| 254                                    | Diagnosis: Acute myocardial infarction (MI) |
| 247                                    | Diagnosis: Hypotension                      |
| 148                                    | Procedure: Coronary angioplasty             |
| 104                                    | Procedure: Pacemaker placed                 |
| 83                                     | Diagnosis: Cardiac arrest/sudden death      |
| 66                                     | Procedure: Coronary bypass graft (CABG)     |
| 55                                     | Diagnosis: Cardiomyopathy                   |
| 44                                     | Procedure: Cardioversion                    |
| 37                                     | Diagnosis: Pericarditis &/or tamponade      |
| 20                                     | Procedure: AICD (defibrillator) placement   |
| 8                                      | Procedure: Pericardial procedure            |
| <b>Infection-related (N=2215)</b>      |                                             |
| 1503                                   | Procedure: Antibiotic Therapy               |
| 501                                    | Diagnosis: Septicemia                       |
| 482                                    | Diagnosis: Pneumonia                        |
| 343                                    | Diagnosis: Fever or chills, source unknown  |
| 247                                    | Procedure: Other Infectious Diseases        |
| 231                                    | Diagnosis: Other Infectious Diseases        |
| 165                                    | Diagnosis: Wound Infection                  |
| 142                                    | Diagnosis: Urinary Tract Infection          |
| 111                                    | Diagnosis: Cellulitis/soft tissue infection |
| 106                                    | Diagnosis: Abscess                          |
| 93                                     | Procedure: Abscess Drainage                 |
| 82                                     | Diagnosis: Viral infection                  |
| 60                                     | Diagnosis: Osteomyelitis                    |
| 27                                     | Diagnosis: Endocarditis                     |
| 15                                     | Diagnosis: Fungal infection                 |

7      Diagnosis: Meningitis

---

**Skin-related (N=245)**

132      Diagnosis: Other - Skin

94      Diagnosis: Cellulitis/Skin infection

33      Diagnosis: Rash

**Mental status change / confusion (N=249)**

249      Diagnosis: Mental status change/confusion

---

Number of events will exceed the total because patients may have more than 1 diagnosis/procedure code associated with the hospitalization

Table S2

**Patient characteristics for included vs. excluded patients**

| <b>Patient characteristic</b>  | <b>Included</b> | <b>Excluded</b> |
|--------------------------------|-----------------|-----------------|
| N patients                     | 23264           | 11430           |
| Case-mix                       |                 |                 |
| Age (years)                    | 63.8 ± 14.5     | 64.6 ± 15.6     |
| Sex (% male)                   | 14321 (62%)     | 6978 (61%)      |
| Vintage (years)                | 2.6 (0.8, 6.2)  | 1.4 (0.2, 4.6)  |
| Post-dialysis weight (kg)      | 70 ± 19         | 72 ± 20         |
| Treatments                     |                 |                 |
| IDWL (% of body weight)        | 3.0 ± 1.4       | 2.7 ± 1.4       |
| Single pool Kt/V               | 1.48 ± 0.32     | 1.47 ± 0.34     |
| < 3 HD sessions/week (%)       | 987 (4%)        | 509 (5%)        |
| Catheter use (%)               | 4279 (20%)      | 1504 (33%)      |
| Hemodiafiltration (%)          | 3752 (16%)      | 1660 (15%)      |
| ESA use (%)                    | 19282 (86%)     | 7988 (80%)      |
| ESA dose (1000 units/wk)       | 7.5 (4.0, 12.0) | 8.8 (5.0, 14.0) |
| Laboratory values              |                 |                 |
| Hemoglobin (g/dL)              | 11.1 ± 1.4      | 10.8 ± 1.5      |
| Serum Albumin (g/dL)           | 3.70 ± 0.48     | 3.59 ± 0.56     |
| Serum Creatinine (mg/dL)       | 8.7 ± 3.0       | 7.7 ± 3.0       |
| CRP (mg/L)                     | 4.0 (1.1, 9.7)  | 5.0 (2.0, 14.1) |
| Serum Phosphorus (mg/dL)       | 5.2 ± 1.6       | 5.1 ± 1.6       |
| PTH (pg/mL)                    | 215 (110, 390)  | 237 (126, 426)  |
| Serum Calcium (mg/dL)          | 8.9 ± 0.8       | 8.8 ± 0.8       |
| Comorbid conditions (%)        |                 |                 |
| Coronary artery disease        | 7652 (33%)      | 4195 (37%)      |
| Heart failure                  | 4621 (20%)      | 2771 (25%)      |
| Cerebrovascular disease        | 3252 (14%)      | 1839 (16%)      |
| Other cardiovascular disease   | 6106 (26%)      | 3303 (29%)      |
| Cancer (non-skin)              | 3116 (14%)      | 1537 (14%)      |
| Diabetes                       | 9346 (41%)      | 5164 (46%)      |
| Gastrointestinal bleeding      | 913 (4%)        | 518 (5%)        |
| Hypertension                   | 19807 (86%)     | 9840 (88%)      |
| Lung disease                   | 2527 (11%)      | 1526 (14%)      |
| Neurologic disease             | 1909 (8%)       | 1659 (15%)      |
| Dementia                       | 200 (1%)        | 302 (3%)        |
| Non-dementia                   | 1707 (7%)       | 1357 (12%)      |
| Psychiatric disorder           | 3035 (13%)      | 1903 (17%)      |
| Peripheral vascular disease    | 5244 (23%)      | 3110 (28%)      |
| Recurrent cellulitis, gangrene | 1665 (7%)       | 1059 (9%)       |

|             |           |          |
|-------------|-----------|----------|
| Hepatitis C | 1173 (5%) | 487 (4%) |
| Cirrhosis   | 357 (2%)  | 191 (2%) |

Mean  $\pm$  standard deviation, median (interquartile range), or % shown. ESA dose shown among ESA users; IDWL=Intradialytic weight loss, expressed in terms of % body weight; Neurologic disease includes dementia, seizure disorder, cognitive impairment, and Parkinson's disease; Psychiatric disorder includes depression, bipolar disorder, schizophrenia/psychotic disorder, alcohol abuse within past 12 months, and other substance abuse within past 12 months.

Table S3

**Pruritus and HR (95% CI) of all-cause mortality, by level of adjustment**

|                                             | <b>N (%)<br/>patients</b> | <b>Model 1<br/>DOPPS phase,<br/>country</b> | <b>Model 2<br/>+ Age, sex,<br/>vintage</b> | <b>Model 3<br/>+ 15 comorbidities</b> | <b>Model 4<br/>+ Weight, Alb, Hgb,<br/>Phos, Catheter use</b> |
|---------------------------------------------|---------------------------|---------------------------------------------|--------------------------------------------|---------------------------------------|---------------------------------------------------------------|
| Self-reported extent bothered by itchy skin |                           |                                             |                                            |                                       |                                                               |
| Not at all                                  | 7665 (33%)                | 1 (Ref.)                                    | 1 (Ref.)                                   | 1 (Ref.)                              | 1 (Ref.)                                                      |
| Somewhat                                    | 7009 (30%)                | 0.96 (0.88, 1.05)                           | 0.97 (0.88, 1.06)                          | 0.97 (0.88, 1.06)                     | 0.99 (0.90, 1.08)                                             |
| Moderately                                  | 4258 (18%)                | 1.20 (1.09, 1.32)                           | 1.14 (1.03, 1.25)                          | 1.11 (1.00, 1.22)                     | 1.11 (1.00, 1.22)                                             |
| Very much                                   | 2711 (12%)                | 1.22 (1.09, 1.36)                           | 1.15 (1.03, 1.28)                          | 1.04 (0.94, 1.17)                     | 1.02 (0.91, 1.14)                                             |
| Extremely                                   | 1621 (7%)                 | 1.59 (1.41, 1.81)                           | 1.54 (1.36, 1.75)                          | 1.34 (1.18, 1.53)                     | 1.24 (1.08, 1.41)                                             |

Cox regression models with expanding sets of covariate adjustment; Model 1 stratified by DOPPS phase and country; Model 2 additionally adjusted for demographics; Model 3 additionally adjusted for 15 comorbidities (listed in Table 1); Model 4 (primary model) additionally adjusted for post-dialysis body weight, serum albumin, hemoglobin, serum phosphorus, and catheter use.
